# Supplementary material
Source: Royal Society of Chemistry journal article supplement (doi:10.1039/d6cc02843h)
Supplement: d6cc02843h1.pdf [file d6cc02843h1.pdf]

## Electronic Supplementary Information (ESI)

### Twisted Graphene-Like MOFs for Efficient CO<sub>2</sub> Photoreduction

Hui Zhang, Zhenhao Peng, Wenyu Yuan\*, Boda Li, and Quan-Guo Zhai\*

Key Laboratory of Applied Surface and Colloid Chemistry, Ministry of Education, School of Chemistry & Chemical Engineering, Shaanxi Normal University, Xi'an, Shaanxi 710062, China.

\*Email: wenyu.yuan@snnu.edu.cn; zhaiqg@snnu.edu.cn

## 1. Experimental section

### 1.1 Materials

Hexahydrated nickel(II) nitrate ( $\text{Ni}(\text{NO}_3)_2 \cdot 6\text{H}_2\text{O}$ , >98%), 1,3,5-benzenetriacetic acid ( $\text{H}_3\text{BTC}$ , >98%) were all purchased from Aladdin Biochemical Technology Co., Ltd. (Shanghai, China). N,N-dimethylformamide ( $\text{C}_3\text{H}_7\text{NO}$ , >99.5%), N-methylformamide ( $\text{C}_2\text{H}_5\text{NO}$ , >99%), dichloromethane ( $\text{CH}_2\text{Cl}_2$ , >99.5%), acetonitrile ( $\text{CH}_3\text{CN}$ , >99.8%), pyrazine ( $\text{C}_4\text{H}_4\text{N}_2$ , >98%), pyridine ( $\text{C}_5\text{H}_5\text{N}$ , >98%), triethanol ( $\text{C}_6\text{H}_{15}\text{NO}_3$ , >99%) were all purchased from Sinopharm Group Chemical Reagents Co., Ltd. (Shanghai, China).

### 1.2 Synthesis

Synthesis of Ni-BTC-pyz-0°: Dissolve the mixture of  $\text{Ni}(\text{NO}_3)_2 \cdot 6\text{H}_2\text{O}$  (38 mg),  $\text{H}_3\text{BTC}$  (24 mg), and pyrazine (26 mg) in a 20 mL glass bottle containing 4 mL NMF. Perform ultrasonic treatment for 30 minutes, then heat the mixed solution to 70°C and let it react for 48 hours. After washing the product with fresh DMF, obtain green column-shaped crystals.<sup>1</sup>

Synthesis of Ni-BTC-pyz-30°: Dissolve the mixture of  $\text{Ni}(\text{NO}_3)_2 \cdot 6\text{H}_2\text{O}$  (145 mg),  $\text{H}_3\text{BTC}$  (105 mg), and pyrazine (40 mg) in a 20 mL glass bottle containing 10 mL DMF. Perform ultrasonic treatment for 30 minutes, then heat the mixed solution to 130°C and let it react for 72 hours. After washing the product with fresh DMF, obtain light green column-shaped crystals.<sup>2</sup>

Synthesis of Ni-BTC-pyz-60°: Dissolve the mixture of  $\text{Ni}(\text{NO}_3)_2 \cdot 6\text{H}_2\text{O}$  (95 mg),  $\text{H}_3\text{BTC}$  (58 mg), and pyrazine (66 mg) in a 20 mL glass bottle containing 10 mL DMF. Perform ultrasonic treatment for 30 minutes, then heat the mixed solution to 70°C and let it react for 48 hours. After washing the product with fresh DMF, obtain dark green column-shaped crystals.<sup>3</sup>

Synthesis of Ni-BTC-py-60°: Dissolve the mixture of  $\text{Ni}(\text{NO}_3)_2 \cdot 6\text{H}_2\text{O}$  (29 mg),  $\text{H}_3\text{BTC}$  (21 mg), and pyridine (81  $\mu\text{L}$ ) in a 20 mL glass bottle containing 10 mL DMF. Perform ultrasonic treatment for 30 minutes, then heat the mixed solution to 100°C and let it

react for 48 hours. After washing the product with fresh DMF, obtain green column-shaped crystals.<sup>4</sup>

Synthesis of Ni-BTC-dmf-60°: Dissolve the mixture of Ni(NO<sub>3</sub>)<sub>2</sub>·6H<sub>2</sub>O (145 mg) and H<sub>3</sub>BTC (105 mg) in a 20 mL glass bottle containing 10 mL DMF. Perform ultrasonic treatment for 30 minutes, then heat the mixed solution to 130°C and let it react for 72 hours. After washing the product with fresh DMF, obtain yellowish green column-shaped crystals.<sup>4</sup>

Sample activation: Soak the synthesized samples in dichloromethane for 3 days. Perform solvent replacement twice a day during this period. Then, vacuum dry at 80°C for 12 hours.

## **2. Photocatalytic CO<sub>2</sub> reduction performance measurements**

Before the photocatalytic reaction, all samples were activated to retain the original pore structure and avoid the side effect of small solvent molecules on the results. The CO<sub>2</sub> photoreduction properties were evaluated using a quartz photocatalytic reaction system. Add 5 mg of the activated sample, [Ru(bpy)<sub>3</sub>]Cl<sub>2</sub>•6H<sub>2</sub>O (5 mg), CH<sub>3</sub>CN (8 mL), TEOA (2 mL), and H<sub>2</sub>O (2 mL) to a 180 mL quartz photochemical reactor. The reactor was vacuumed for 1 min aer sealing, and then CO<sub>2</sub> gas was passed through the reactor for 15 min until the mixture was CO<sub>2</sub> saturated. A 300 W xenon lamp with λ > 400 nm filter was used as the irradiation light source. The gas products were analysed by gas chromatography (GC), and the liquid products were analysed by <sup>1</sup>H nuclear magnetic resonance (<sup>1</sup>H-NMR) spectroscopy. The incident light intensity was determined using a PL-MW2000 optical power meter.

## **3. Photoelectrochemical measurements**

Photoelectrochemical experiments were performed in a threeelectrode system with 0.2 M Na<sub>2</sub>SO<sub>4</sub> as the electrolyte. For the preparation of the working electrode, 20 mg as-synthesized photocatalyst was dissolved in 10 μL Nafion solution and 1 mL methanol. Then, 200 μL of the aforementioned suspension was deposited on the FTO

and dried at room temperature. An Ag/AgCl electrode and a platinum electrode were used as the reference electrode and the counter electrode, respectively. All electrochemical characterization tests were performed on a CHI 760E electrochemical workstation.

#### **4. In situ FT-IR spectroscopy**

At room temperature, in-situ diffuse reflectance infrared tests were conducted using an infrared spectrometer (Bruker INVENIO S). The sample powder was added to the high-temperature diffuse reflection reaction chamber, with KBr used as the background. Then, under the irradiation of a deuterium lamp, carbon dioxide gas was introduced into the distilled water through bubbling, and data were collected at different time points.

## 5. Supplementary Figures and Tables

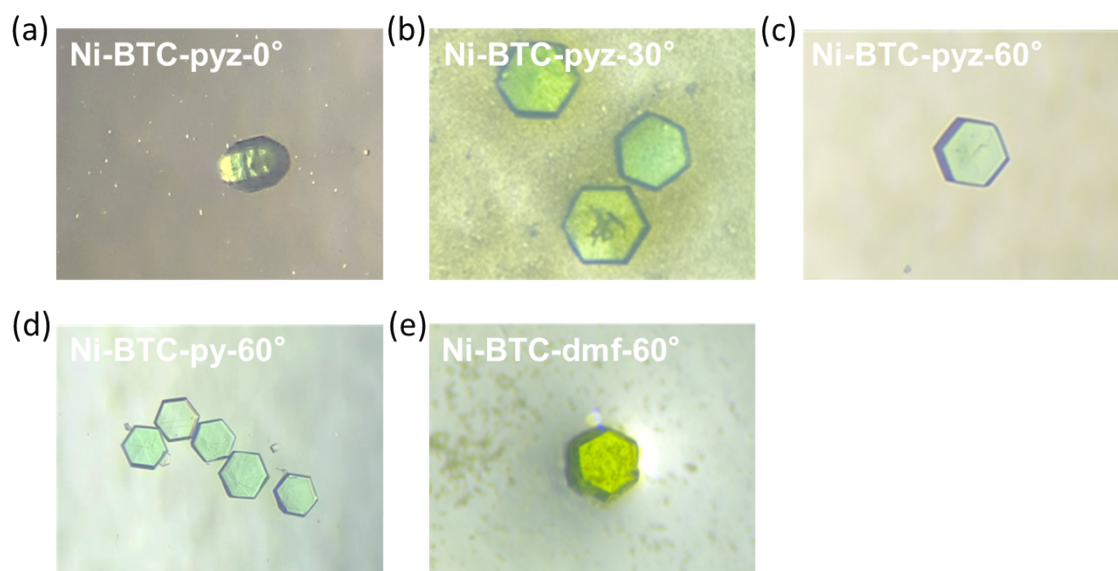

**Fig. S1** Optical photos of the Ni-BTC-pyz-0°, Ni-BTC-pyz-30°, Ni-BTC-pyz-60°, Ni-BTC-py-60° and Ni-BTC-dmf-60° single crystals.

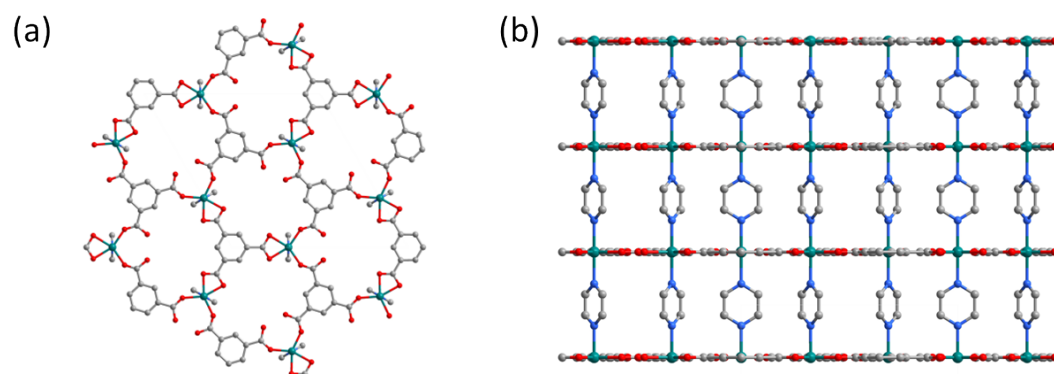

**Fig. S2** (a) The three-dimensional structure of Ni-BTC-pyz-0° along the c-axis direction, and (b) the three-dimensional structure of Ni-BTC-pyz-0° along the b-axis direction.

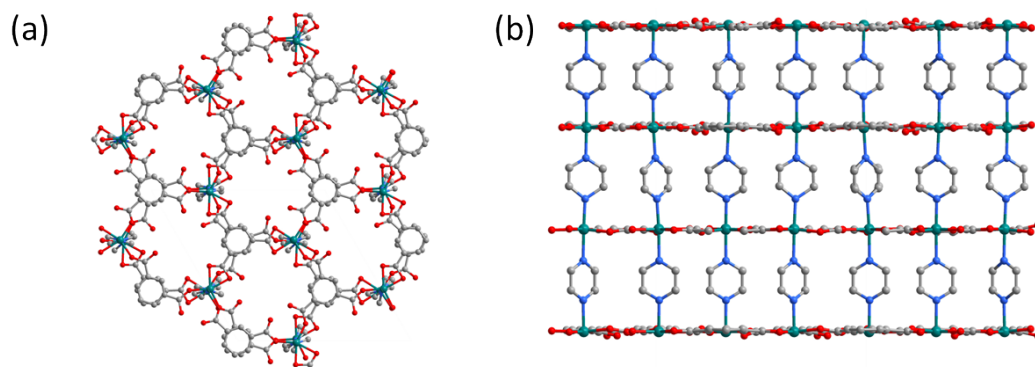

**Fig. S3** (a) The three-dimensional structure of Ni-BTC-pyz-30° along the c-axis direction, and (b) the three-dimensional structure of Ni-BTC-pyz-30° along the b-axis direction.

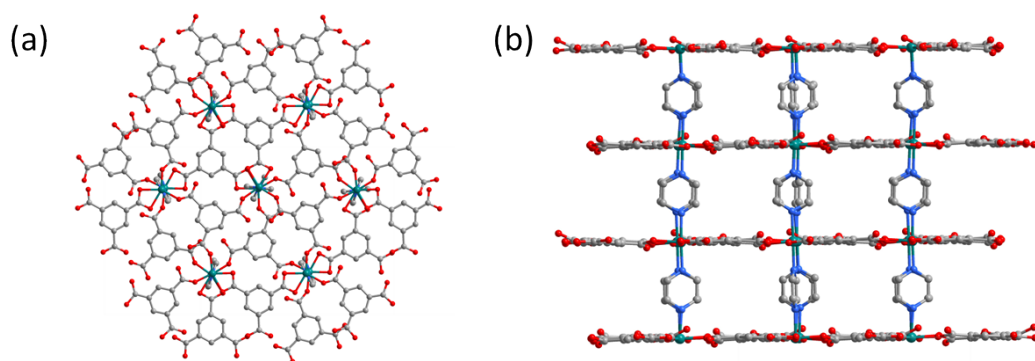

**Fig. S4** (a) The three-dimensional structure of Ni-BTC-pyz-60° along the c-axis direction, and (b) the three-dimensional structure of Ni-BTC-pyz-60° along the b-axis direction.

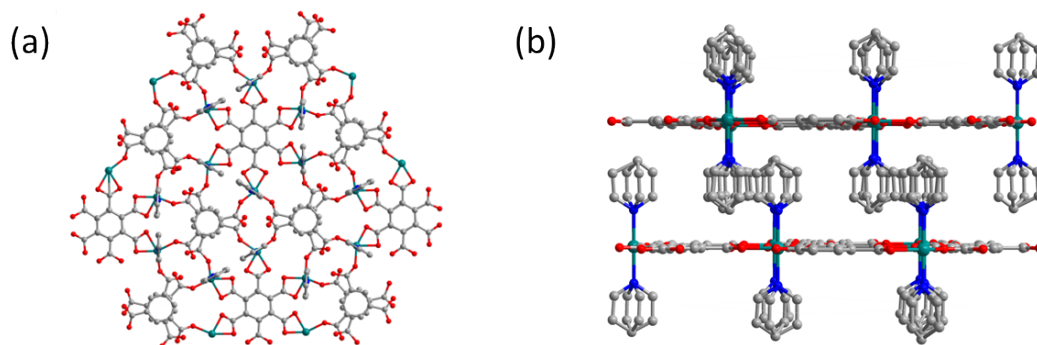

**Fig. S5** (a) The three-dimensional structure of Ni-BTC-py-60° along the c-axis direction, and (b) the three-dimensional structure of Ni-BTC-py-60° along the b-axis direction.

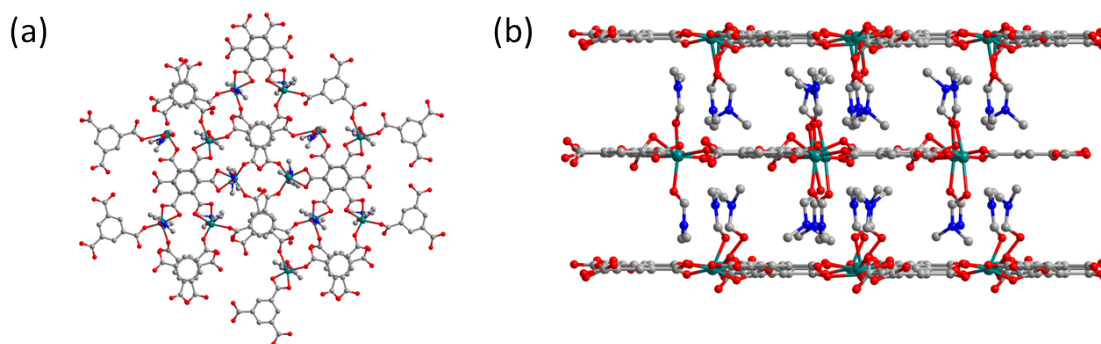

**Fig. S6** (a) The three-dimensional structure of Ni-BTC-dmf-60° along the c-axis direction, and (b) the three-dimensional structure of Ni-BTC-dmf-60° along the b-axis direction.

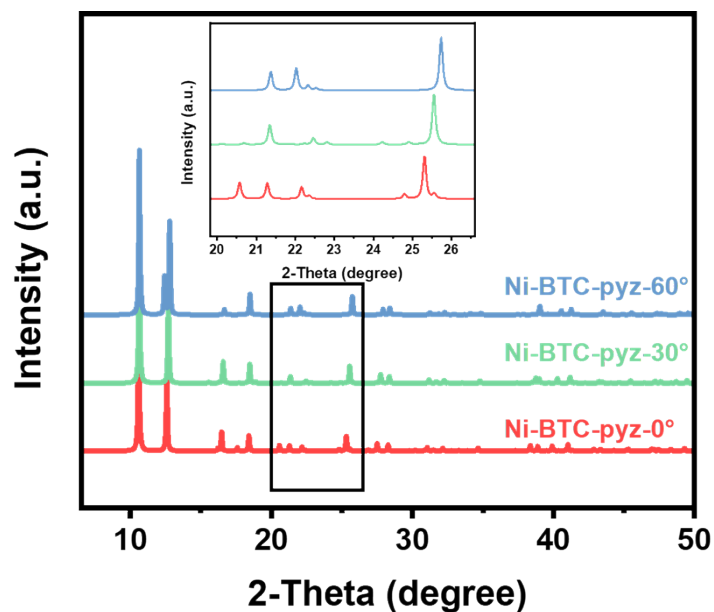

**Fig. S7** A comparison of PXRD patterns for Ni-BTC-pyz-0°, Ni-BTC-pyz-30° and Ni-BTC-pyz-60°.

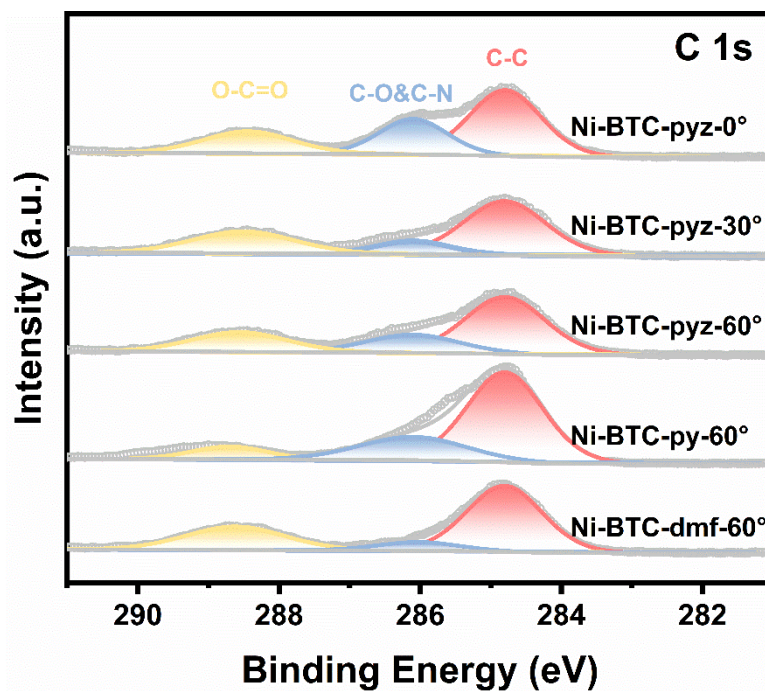

**Fig. S8** XPS spectra of C 1s in Ni-BTC-pyz-0°, Ni-BTC-pyz-30°, Ni-BTC-pyz-60°, Ni-BTC-py-60° and Ni-BTC-dmf-60.

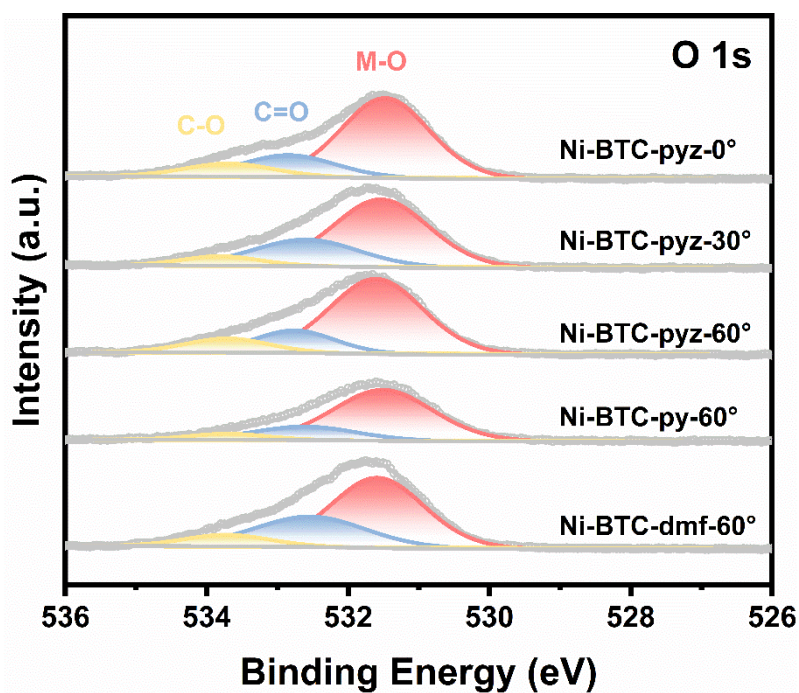

**Fig. S9** XPS spectra of O 1s in Ni-BTC-pyz-0°, Ni-BTC-pyz-30°, Ni-BTC-pyz-60°, Ni-BTC-py-60° and Ni-BTC-dmf-60.

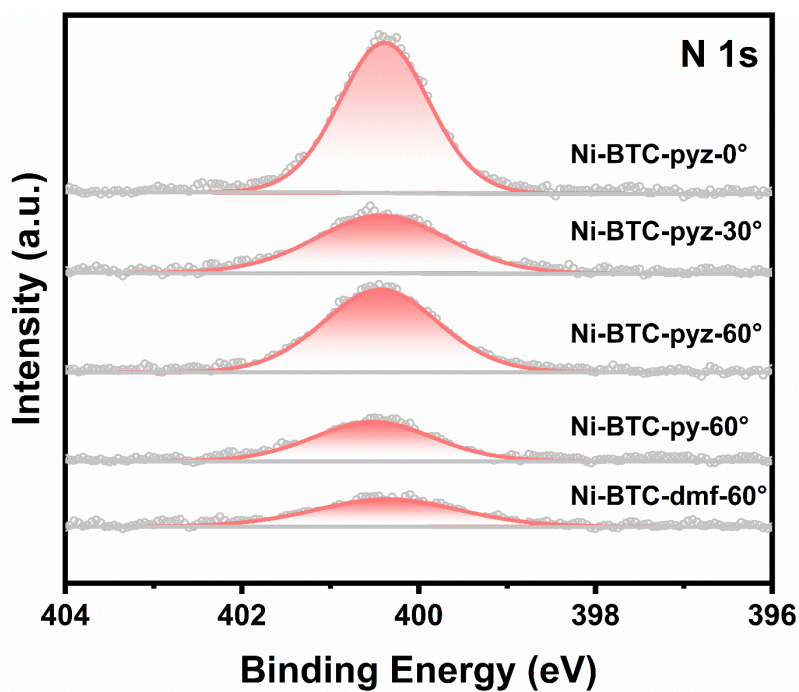

**Fig. S10** XPS spectra of N 1s in Ni-BTC-pyz-0°, Ni-BTC-pyz-30°, Ni-BTC-pyz-60°, Ni-BTC-py-60° and Ni-BTC-dmf-60.

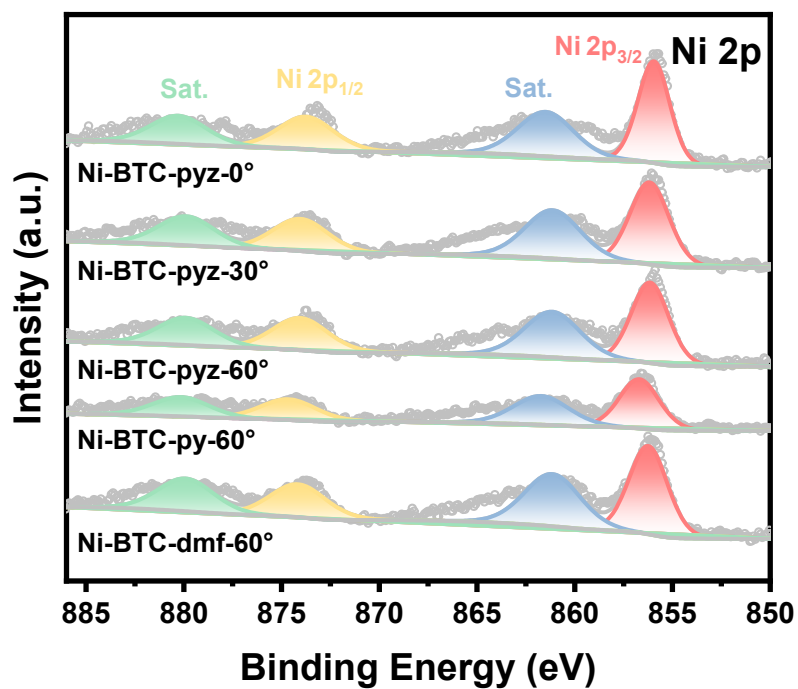

**Fig. S11** XPS spectra of Ni 2p in Ni-BTC-pyz-0°, Ni-BTC-pyz-30°, Ni-BTC-pyz-60°, Ni-BTC-py-60° and Ni-BTC-dmf-60

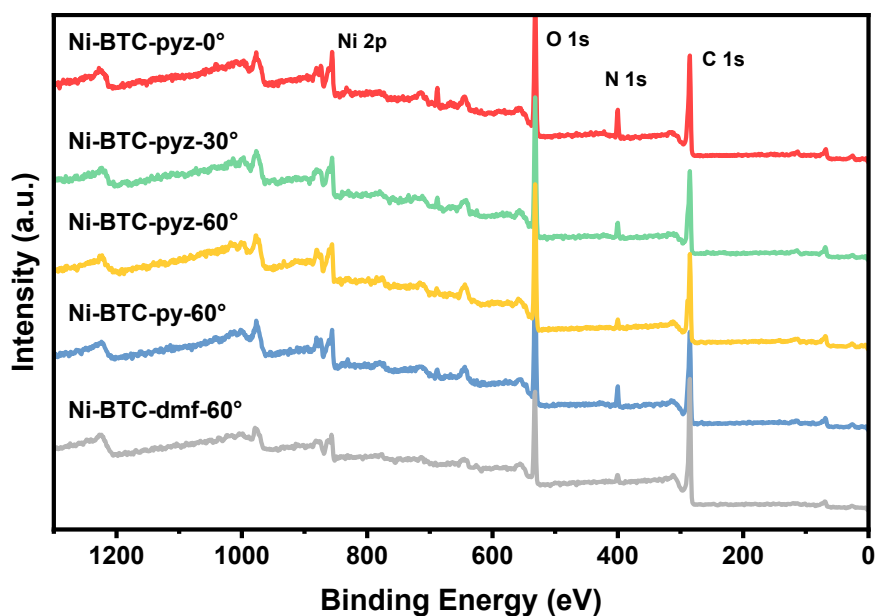

**Fig. S12** The full XPS spectra of Ni-BTC-pyz-0°, Ni-BTC-pyz-30°, Ni-BTC-pyz-60°, Ni-BTC-py-60° and Ni-BTC-dmf-60.

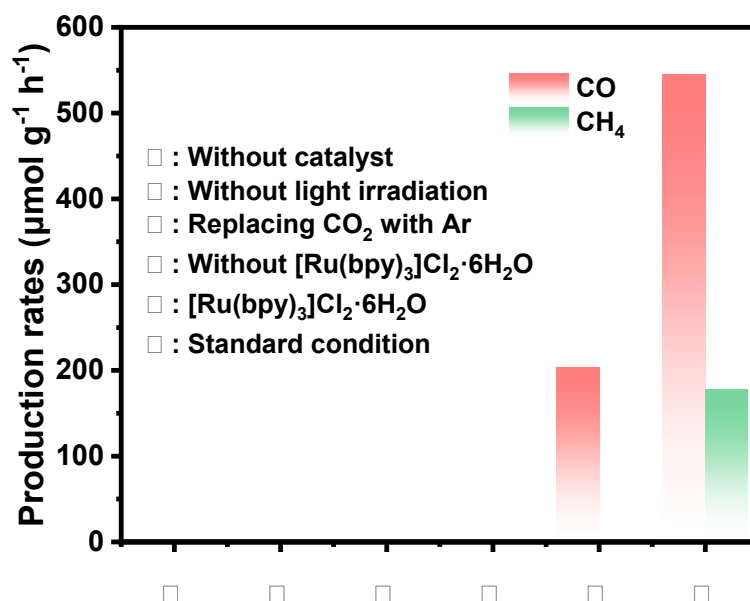

Fig. S13 Control experiments in various conditions over Ni-BTC-pyz-60°.

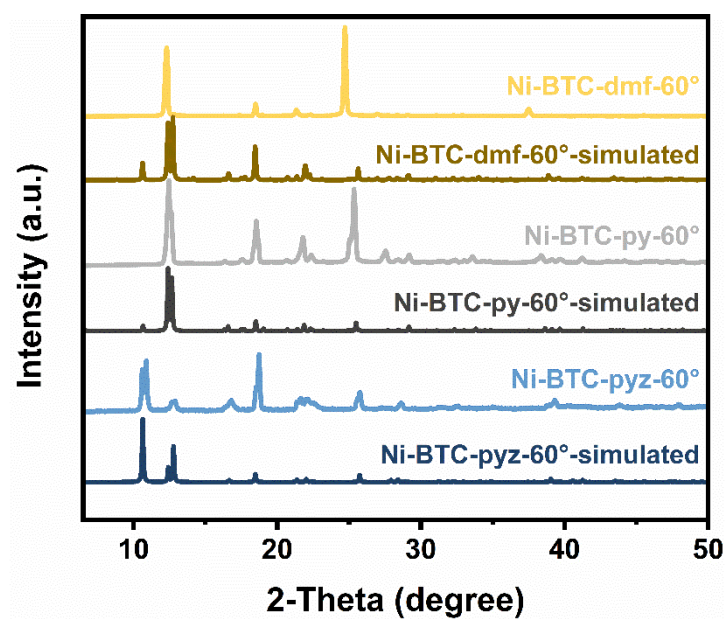

Fig. S14 PXRD of Ni-BTC-X-60° under different column ligands. Comparison of the photocatalytic.

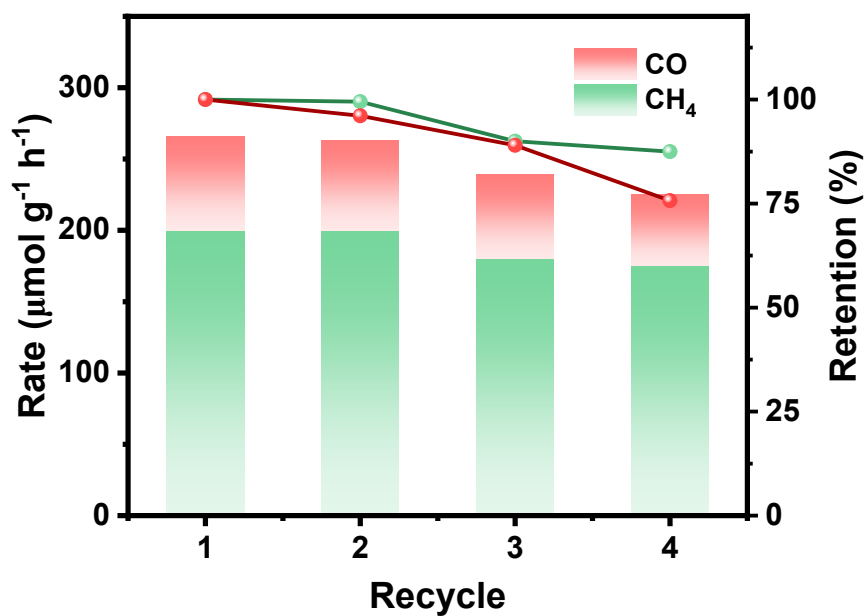

Fig. S15 Reusability of Ni-BTC-dmf-60° for four cycles.

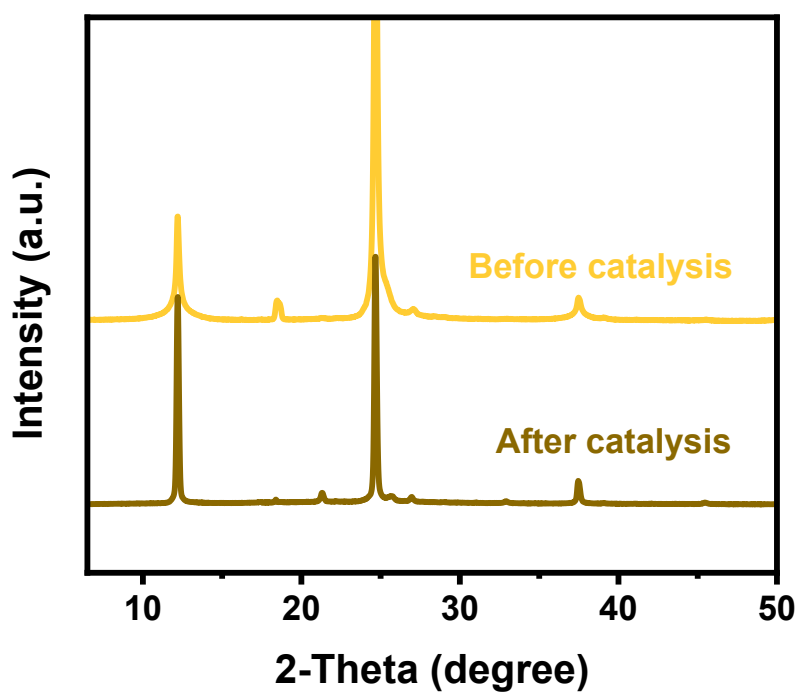

Fig. S16 PXRD patterns of Ni-BTC-dmf-60° before and after catalysis.

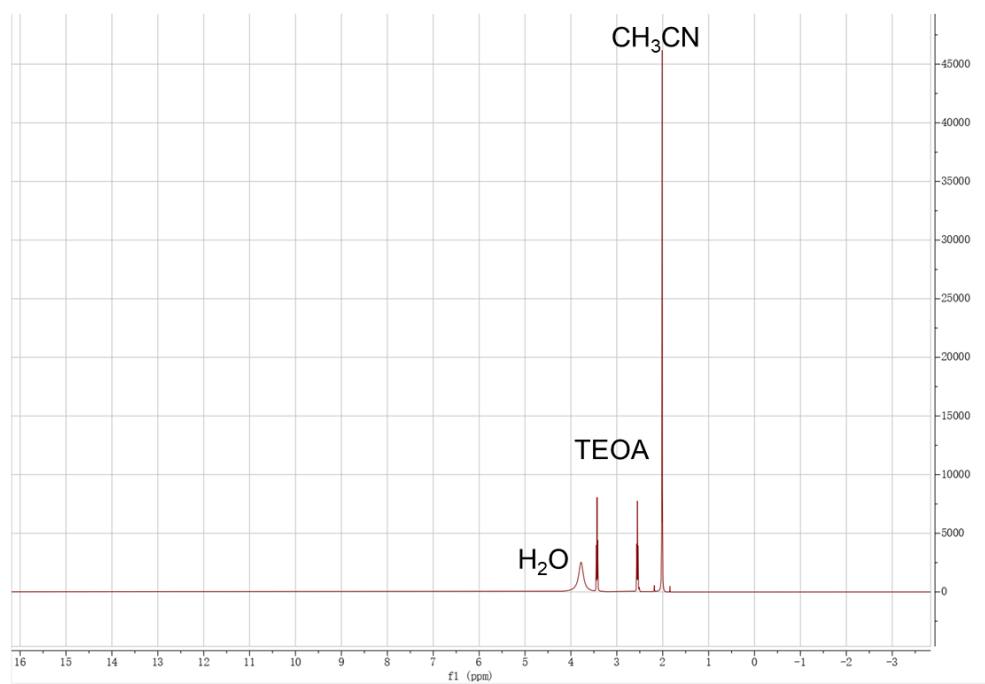

**Fig. S17** The <sup>1</sup>H NMR spectra of the liquids after the photocatalytic experiments using Ni-BTC-dmf-60°.

**Table S1. Summary of photocatalytic CO<sub>2</sub> to CO and CH<sub>4</sub> over MOF catalysts.**

| Photocatalysts                      | Conditions                                                                 | Light intensity (W) | Yield of CO ( $\mu\text{mol g}^{-1} \text{h}^{-1}$ ) | Yield of CH <sub>4</sub> ( $\mu\text{mol g}^{-1} \text{h}^{-1}$ ) | Ref.      |
|-------------------------------------|----------------------------------------------------------------------------|---------------------|------------------------------------------------------|-------------------------------------------------------------------|-----------|
| Ni-BTC-pyz-0°                       | CO <sub>2</sub> , H <sub>2</sub> O<br>$\lambda > 400 \text{ nm}$           | 300                 | 548.2                                                | 3.9                                                               | This work |
| Ni-BTC-pyz-30°                      | CO <sub>2</sub> , H <sub>2</sub> O<br>$\lambda > 400 \text{ nm}$           | 300                 | 108.5                                                | 1.4                                                               | This work |
| Ni-BTC-pyz-60°                      | CO <sub>2</sub> , H <sub>2</sub> O<br>$\lambda > 400 \text{ nm}$           | 300                 | 544.7                                                | 177.8                                                             | This work |
| ZrPP-1-Co                           | CO <sub>2</sub> , H <sub>2</sub> O<br>$\lambda > 420 \text{ nm}$           | 300                 | 14                                                   | 0.5                                                               | 5         |
| MIL-100 (Fe)                        | CO <sub>2</sub> ,TEOA<br>400-700nm                                         | 300                 | 3.9                                                  | 47.3                                                              | 6         |
| NH <sub>2</sub> -MIL-125@Ni<br>-BDC | CO <sub>2</sub> , H <sub>2</sub> O<br>$\lambda > 400 \text{ nm}$           | 300                 | 41.38                                                | 5.91                                                              | 7         |
| MOF-525-Co                          | CO <sub>2</sub><br>MeCN/TEOA = 4:1<br>400-800nm                            | 300                 | 200.6                                                | 36.6                                                              | 8         |
| Monolayer MOF 1                     | CO <sub>2</sub><br>MeCN/H <sub>2</sub> O/TEOA<br>= 8:2:1<br>AM 1.5G filter | 300                 | 365.5                                                | 0                                                                 | 9         |
| Bilayer MOF 2                       | CO <sub>2</sub><br>MeCN/H <sub>2</sub> O/TEOA<br>= 8:2:1<br>AM 1.5G filter | 300                 | 276.8                                                | 0                                                                 | 9         |
| NH <sub>2</sub> -UiO-66             | CO <sub>2</sub> , H <sub>2</sub> O<br>420 - 800 nm                         | 300                 | 3.9                                                  | 1.1                                                               | 10        |
| Zr-PS-FeTCPP                        | CO <sub>2</sub><br>ACE,TEA                                                 | 500                 | 247.8                                                | 36.6                                                              | 11        |
| NH <sub>2</sub> -MIL-125(Ti)        | CO <sub>2</sub> , H <sub>2</sub> O<br>AM 1.5G filter                       | 300                 | 24.49                                                | 6.43                                                              | 11        |

|               |                                                          |     |       |      |    |
|---------------|----------------------------------------------------------|-----|-------|------|----|
| MOF-808       | CO <sub>2</sub> , H <sub>2</sub> O<br>420 - 800 nm       | 300 | 0     | 102  | 12 |
| pcn-222       | CO <sub>2</sub> , H <sub>2</sub> O<br>$\lambda > 420$ nm | 300 | 6.8   | 0.2  | 13 |
| Bi-PMOF-120-F | CO <sub>2</sub><br>MeCN,TEOA<br>$\lambda > 420$ nm       | 300 | 28.61 | 8.81 | 14 |
| MOF 1-OH      | CO <sub>2</sub> , H <sub>2</sub> O<br>420 - 800 nm       | 300 | 33.9  | 23.6 | 15 |

## 6. Reference

- 1 . Y.-Y. Liu, P. Zhang, W.-Y. Yuan, Y. Wang, Q.-G. Zhai, *ACS Appl. Mater. Interfaces.*, 2024, **16**, 33451-33460.
- 2 . C. Gao, S. Liu, L. Xie, C. Sun, J. Cao, Y. Ren, D. Feng, Z. Su, *CrystEngComm*, 2009, **11**, 177-182.
- 3 . S. Jeong, D. Kim, S. Shin, D. Moon, S. J. Cho, M. S. Lah, *Chem. Mater.*, 2014, **26**, 1711-1719.
- 4 . Y. Chen, Z. Wu, L. Fan, R. Krishna, H. Huang, Y. Wang, Q. Xiong, J. Li, L. Li, *Engineering*, 2024, **41**, 84-92.
- 5 . E.-X. Chen, M. Qiu, Y.-F. Zhang, Y.-S. Zhu, L.-Y. Liu, Y.-Y. Sun, X. Bu, J. Zhang, Q. Lin, *Adv. Mater.*, 2018, **30**, 1704388.
- 6 . X.-Y. Dao, J.-H. Guo, X.-Y. Zhang, S.-Q. Wang, X.-M. Cheng, W.-Y. Sun, *J. Mater. Chem. A*, 2020, **8**, 25850-25856.
- 7 . B. He, Y.-J. Wang, X. Bai, H. Bian, Y. Xie, R. Li, J.-R. Li, *Chem. Eng. J.*, 2024, **482**, 149000.
- 8 . H. Zhang, J. Wei, J. Dong, G. Liu, L. Shi, P. An, G. Zhao, J. Kong, X. Wang, X. Meng, J. Zhang, J. Ye, *Angew. Chem. Int. Ed.*, 2016, **55**, 14310-14314.
- 9 . J. Liang, H. Yu, J. Shi, B. Li, L. Wu, M. Wang, *Adv. Mater.*, 2023, **35**, 2209814.
10. W. Huang, Z. Zhang, J. Xu, H. Cui, K. Tang, D. Crawshaw, J. Wu, X. Zhang, L. Tang, N. Liu, *JACS Au*, 2025, **5**, 1184-1195.
11. Y. Yin, S. Feng, X. Xu, Y. Liu, Y. Li, L. Gao, X. Zhou, J. Dong, Y. Wu, J. Su, J.-L. Zuo, S. Yuan, J. Zhu, *J. Am. Chem. Soc.*, 2025, **147**, 16481-16493.
12. S. Karmakar, S. Barman, F. A. Rahimi, D. Rambabu, S. Nath, T. K. Maji, *Nat. Commun.*, 2023, **14**, 4508.
13. T. Huang, J. Han, Z. Li, Y. Hong, X. Gu, Y. Wu, Y. Zhang, S. Liu, *Angew. Chem. Int. Ed.*, 2025, **64**, e202500269.
14. M. Cheng, P. Yan, X. Zheng, B. Gao, X. Yan, G. Zhang, X. Cui, Q. Xu, *Chem. Eur. J.*, 2023, **29**, e202302395.
15. L. Wang, Y. Gu, F. Li, *Chem. Catal.*, 2024, **4**, 101154.
